# 1 **Host-parasite coevolution in populations of** 2 **constant and variable size**

3 Yixian Song<sup>1</sup>, Chaitanya S. Gokhale<sup>1,2</sup>, Andrei Papkou<sup>3</sup>,  
4 Hinrich Schulenburg<sup>3</sup>, and Arne Traulsen<sup>1</sup>

5 <sup>1</sup> *Department of Evolutionary Theory, Max Planck Institute for Evolutionary Biology, Plön,*  
6 *Germany*

7 <sup>2</sup> *New Zealand Institute for Advanced Study, Massey University, Auckland, New Zealand*

8 <sup>3</sup> *Department of Evolutionary Ecology and Genetics, University of Kiel, Kiel, Germany*

9 November 27, 2014

## 10 **Abstract**

11 The matching-allele and gene-for-gene models are widely used in math-  
12 ematical approaches that study the dynamics of host-parasite interactions.  
13 Agrawal and Lively (Evolutionary Ecology Research 4:79-90, 2002) cap-  
14 tured these two models in a single framework and numerically explored the  
15 associated time discrete dynamics of allele frequencies. Here, we present  
16 a detailed analytical investigation of this unifying framework in continuous

17 time and provide a generalization. We extend the model to take into account  
 18 changing population sizes, which result from the antagonistic nature of the  
 19 interaction and follow the Lotka-Volterra equations. Under this extension,  
 20 the population dynamics become most complex as the model moves away  
 21 from pure matching-allele and becomes more gene-for-gene-like. While the  
 22 population densities oscillate with a single oscillation frequency in the pure  
 23 matching-allele model, a second oscillation frequency arises under gene-for-  
 24 gene-like conditions. These observations hold for general interaction param-  
 25 eters and allow to infer generic patterns of the dynamics. Our results suggest  
 26 that experimentally inferred dynamical patterns of host-parasite coevolution  
 27 should typically be much more complex than the popular illustrations of  
 28 Red Queen dynamics. A single parasite that infects more than one host can  
 29 substantially alter the cyclic dynamics.

30 Running Head: Constant versus changing population size

31 Keywords: matching-allele, gene-for-gene, Lotka-Volterra equation, Replicator

32 Dynamics, Red Queen hypothesis, stability analysis

# 1 Introduction

The antagonistic interaction between hosts and their parasites are of particular interest in ecology and evolution because they are ubiquitous and usually associated with high selection pressure that affects numerous life history traits. Because of the negative effect of parasites on host fitness, the study of these interactions is of central importance in biomedical (Woolhouse et al., 2002, 2005), agricultural (Van der Plank, 1984; Gladieux et al., 2011) and species conservation research (Altizer et al., 2003; Thompson et al., 2010). The exact dynamics are usually evaluated with the help of mathematical models. Among these, the models including an explicit genetic description of host-parasite interaction, such as gene-for-gene (GfG) and matching-allele (MA) models, are particularly widespread. Genetic interaction is usually incorporated by taking into account the current understanding of resistance-infectivity patterns in biological systems. The gene-for-gene (GfG) model was proposed by Flor (1956) to capture disease resistance patterns in plants. Here, a host individual carrying a resistance gene can recognize parasites harboring the corresponding avirulence product and trigger a defense response averting the infection (Jones and Dangl, 2006). Inspired by self-nonspecific recognition in immune systems (Grosberg and Hart, 2000), the matching-allele (MA) model was introduced to reflect host-pathogen interactions in animals. In

52 this case, parasites carrying a certain allele can only invade host individuals with  
 53 the corresponding allele. By combining predictive power of mathematical mod-  
 54 eling and their connection to the empirical data, these models successfully served  
 55 to understand key evolutionary problems. To mention only the most important  
 56 examples, these models were used to assess the Red Queen hypothesis for the  
 57 evolution of sexual reproduction (Lively, 2010), the maintenance of genetic diver-  
 58 sity by parasite-mediated selection (Lively and Apanius, 1995), and the role of the  
 59 cost of resistance/virulence in coevolution (Leonard, 1977; Parker, 1994).

60 Agrawal and Lively (2002) developed a general model that interpolates be-  
 61 tween a pure matching-allele model and a pure gene-for-gene model, as a single  
 62 parameter is tuned between 0 and 1. This model was introduced for haplotypes  
 63 of two loci with mutation and recombination. Variance in host and parasite allele  
 64 frequency was plotted as an evaluation of the time discrete dynamics. The highly  
 65 dynamical aspects of matching-allele models were observed across most of the  
 66 MA-GfG continuum. Agrawal and Lively showed that cyclic dynamics of host  
 67 and parasite genotypes is observed not only in the MA model, but also in all the  
 68 intermediate models and in the GfG model. This finding indicates that the Red  
 69 Queen theory for the evolution of sex does not hinge upon the use of a particular  
 70 model for host parasite interactions. However, this study was computational and

71 only performed for particular parameter sets due to the complexity of the model.  
72 Instead of tackling the dynamics from an analytical perspective to allow for gen-  
73 eral statements for all parameter sets, subsequent theoretical approaches have in-  
74 creased complexity of the assumed interaction in order to increase the biological  
75 realism, for instance by defining a multi-locus model that deals with various com-  
76 binations of MA loci and GfG loci (Agrawal and Lively, 2003).

77 The aim of our study is to improve our understanding of host-parasite coevo-  
78 lution by focusing on an analytical characterization of the involved dynamics. We  
79 investigate both the impact of different types of interaction and the consequence of  
80 interaction-dependent population size changes. We simplify the model of Agrawal  
81 and Lively and focus on a single locus to keep interaction among loci from inter-  
82 fering with the conclusion, in particular the differences between the GfG model  
83 (Tellier and Brown, 2007a) and the MA model (Sardanyés and Solé, 2008). We  
84 use the assumptions of Agrawal and Lively (2002) inspired by Parker (1994) to  
85 connect the two popular models by a single parameter, but also provide an alter-  
86 native, linear interpolation in the discussion. To enhance clarity, we focus on a  
87 system with two host and two parasite genotypes and use their interaction to char-  
88 acterize the involved evolutionary dynamics. In addition, we depart from the usual  
89 assumption of constant population size and apply the Lotka-Volterra equations to

90 acknowledge inter-dependent population dynamics during host-parasite coevolu-  
 91 tion. To compare the dynamics with a model assuming constant population den-  
 92 sity, we apply the Replicator Dynamics with the same interaction matrix between  
 93 hosts and parasites. While the dynamics between the two models is different, it  
 94 seems to be crucial to understand both constant as well as changing population  
 95 size, as there are biological examples for both of them.

96 We conducted a linear stability analysis at the interior fixed point of the result-  
 97 ing nonlinear dynamical system, which indicates critical differences in dynamical  
 98 patterns between the models of host-parasite coevolution. Either with constant or  
 99 with changing population density, the population densities oscillate with a single  
 100 frequency in a pure MA model. In a model deviating from MA, a second oscil-  
 101 lation frequency arises with changing population density, but not with constant  
 102 population size.

## 103 **2 Model**

104 We consider haploid hosts and parasites with two alleles on a single locus. Hence,  
 105 there are two host types and two parasite types that are denoted by  $\mathcal{H}_1$ ,  $\mathcal{H}_2$ ,  $\mathcal{P}_1$ ,  
 106 and  $\mathcal{P}_2$ , respectively. In the simplest case, each parasite type can only infect the

107 corresponding host type. Hence, no host/parasite type is superior to the other.  
 108 This case corresponds to the matching-allele model, which under the assumption  
 109 of constant population density is equivalent to the evolutionary game of matching  
 110 pennies (Hofbauer and Sigmund, 1998; Traulsen et al., 2005).

111 In a GfG model, the virulent parasite  $\mathcal{P}_2$  can potentially infect both hosts,  
 112 the one with susceptible allele  $\mathcal{H}_1$  and the one with resistance allele  $\mathcal{H}_2$ . Yet,  
 113 the avirulent parasite  $\mathcal{P}_1$  can only infect the susceptible host  $\mathcal{H}_1$ , as the host  $\mathcal{H}_2$   
 114 with the resistance allele can prevent infection by  $\mathcal{P}_1$ . Thus, there is an advantage  
 115 to the virulent parasite and the resistant host. To maintain the different types in  
 116 the population, intrinsic costs of virulence and resistance have been suggested  
 117 (Leonard, 1994).

118 Fig. 1 illustrates the fitness of the two parasites on each host for the MA and  
 119 the GfG model and also for two intermediate cases, where the parasite  $\mathcal{P}_2$  can  
 120 “partially” infect the host  $\mathcal{H}_1$ .

121 We simplified the model of Agrawal and Lively (2002) by regarding only one  
 122 locus. The interactions between hosts and parasites can be expressed with two  
 123 matrices (corresponding to a bi-matrix game in evolutionary game theory). For  
 124 the parasite, we assume that the interactions with the hosts increase birth rates.  
 125 The fitness effects arising from the interactions of the parasite with the host are

126 given by the matrix

$$\mathcal{M}^p = \begin{matrix} & \mathcal{H}_1 & \mathcal{H}_2 \\ \begin{matrix} \mathcal{P}_1 \\ \mathcal{P}_2 \end{matrix} & \begin{pmatrix} \sigma & 0 \\ \alpha(1 - \alpha\kappa)\sigma & (1 - \alpha\kappa)\sigma \end{pmatrix} \end{matrix}. \quad (1)$$

127 The maximum virulence of the parasite is given by  $\sigma$ . The parameter  $\kappa$  describes  
128 the cost for the parasite virulence, as usually assumed in the GfG model. This  
129 model interpolates between the MA and the GfG model as the parameter  $\alpha$  is  
130 varied between 0 and 1.

131 For the host, we assume that these interactions increase the death rate accord-  
132 ing to the matrix

$$\mathcal{M}^h = \begin{matrix} & \mathcal{P}_1 & \mathcal{P}_2 \\ \begin{matrix} \mathcal{H}_1 \\ \mathcal{H}_2 \end{matrix} & \begin{pmatrix} -\sigma & -\alpha(1 - \alpha\kappa)\sigma \\ -\alpha\gamma & (1 - \alpha\gamma)(1 - (1 - \alpha\kappa)\sigma) - 1 \end{pmatrix} \end{matrix}, \quad (2)$$

133 where the parameter  $\gamma$  describes the cost for the host resistance.

134 We assume a large population size and focus on the change in population  
135 densities. The population densities of the two host and two parasite types are  
136 given by  $h_1$ ,  $h_2$ ,  $p_1$ , and  $p_2$ , respectively. The population dynamics of the hosts  
137 and parasites can be captured by a set of differential equations,



$$\dot{h}_1 = h_1(b_h + d_{\mathcal{H}_1}) \quad (3a)$$

$$\dot{h}_2 = h_2(b_h + d_{\mathcal{H}_2})$$

$$\dot{p}_1 = p_1(b_{\mathcal{P}_1} - d_p) \quad (3b)$$

$$\dot{p}_2 = p_2(b_{\mathcal{P}_2} - d_p),$$

138 where  $b_h$  is the birth rate of both hosts, and  $d_p$  is the death rate of both parasites.  
 139 As discussed above, the death rates of the hosts and the birth rates of the parasites  
 140 are directly affected by host-parasite interactions. From the interaction matrices  
 141 Eqs. (1) and (2), the death rates for the hosts and the birth rates for the parasites  
 142 are given by

$$d_{\mathcal{H}_1} = \mathcal{M}_{11}^h p_1 + \mathcal{M}_{12}^h p_2 = -\sigma p_1 - \alpha(1 - \alpha\kappa)\sigma p_2 \quad (4a)$$

$$d_{\mathcal{H}_2} = \mathcal{M}_{21}^h p_1 + \mathcal{M}_{22}^h p_2 = -\alpha\gamma p_1 + ((1 - \alpha\gamma)(1 - (1 - \alpha\kappa)\sigma) - 1) p_2$$

$$b_{\mathcal{P}_1} = \mathcal{M}_{11}^p h_1 + \mathcal{M}_{12}^p h_2 = \sigma h_1 \quad (4b)$$

$$b_{\mathcal{P}_2} = \mathcal{M}_{21}^p h_1 + \mathcal{M}_{22}^p h_2 = \alpha(1 - \alpha\kappa)\sigma h_1 + (1 - \alpha\kappa)\sigma h_2$$

143 We will choose the host birth rate  $b_h$  and parasite death rate  $d_p$  in two distinct

ways. Our first approach assumes constant values for  $b_h$  and  $d_p$ , which leads to a host/parasite population that is changing in size. This corresponds to the standard Lotka-Volterra dynamics. The second approach focuses on relative abundances of host and parasite alleles and implies a normalization of the population size. This corresponds to the Replicator Dynamics in evolutionary game theory, which implies constant population size in our context.

### Changing population size induced by interactions

With constant host birth rate  $b_h$  and parasite death rate  $d_p$ , inserting the host parasite interactions Eqs. (4) into the dynamical system Eqs. (3) leads to

$$\dot{h}_1 = h_1 (b_h - p_1\sigma - p_2\alpha(1 - \alpha\kappa)\sigma) \quad (5a)$$

$$\dot{h}_2 = h_2 (b_h - p_1\alpha\gamma - p_2((1 - \alpha\gamma)(1 - \alpha\kappa)\sigma + \alpha\gamma))$$

$$\dot{p}_1 = p_1(\sigma h_1 - d_p) \quad (5b)$$

$$\dot{p}_2 = p_2(\sigma(h_1\alpha(1 - \alpha\kappa) + h_2(1 - \alpha\kappa)) - d_p) .$$

This model results in changes in the population sizes of both hosts and parasites. In particular, the changes are caused by the antagonistic interactions between the hosts and the parasite - as a consequence of the Lotka-Volterra relationship.

## 156 Constant population size

157 To obtain a model of constant population size that is comparable to the one de-  
 158 scribed above, we retain the interaction matrices and adjust the host birth rate and  
 159 parasite death rate to maintain the population size. Requiring constant  $h_1 + h_2$  and  
 160 constant  $p_1 + p_2$  implies  $\dot{h}_1 + \dot{h}_2 = 0$  as well as  $\dot{p}_1 + \dot{p}_2 = 0$ . This leads to

$$b_h = -\frac{h_1 d_{\mathcal{H}_1} + h_2 d_{\mathcal{H}_2}}{h_1 + h_2} \quad (6a)$$

$$d_p = \frac{p_1 b_{\mathcal{P}_1} + p_2 b_{\mathcal{P}_2}}{p_1 + p_2}. \quad (6b)$$

161 The normalization  $h_1 + h_2 = 1$  implies that a single equation for  $h_1$  is sufficient to  
 162 describe the dynamics for the host. Similarly, due to the normalization  $p_1 + p_2 = 1$   
 163 the parasite dynamics are fully captured by tracking  $p_1$ . Applying the dynamical  
 164 host birth and parasite death rates in the dynamical system Eqs. (3), the equations  
 165 become identical to the Replicator Dynamics (RD) (Hofbauer and Sigmund, 1998;  
 166 Taylor and Jonker, 1978; Schuster and Sigmund, 1983),

$$\dot{h}_1 = h_1(1 - h_1)(d_{\mathcal{H}_1} - d_{\mathcal{H}_2}) \quad (7a)$$

$$\dot{p}_1 = p_1(1 - p_1)(b_{\mathcal{P}_1} - b_{\mathcal{P}_2}). \quad (7b)$$

167 While the death rates of the host still depend on the parasites and the birth rates  
168 of the parasites still depend on the hosts, the dynamics of this system is in gen-  
169 eral less complex than in the case of changing population size, as it is only two-  
170 dimensional.

## 171 **3 Population dynamics**

172 To obtain first information about the population dynamics, we calculated the tra-  
173 jectories of the system numerically for a particular set of parameters. In addition,  
174 we identify the fixed points of the differential equations and study their stabil-  
175 ity to gain insight into the coevolutionary dynamics for all parameter sets. More  
176 specifically, we can use a linear stability analysis of the unique interior fixed point  
177 to infer the dynamical patterns arising in this system (Strogatz, 2000; Tellier and  
178 Brown, 2007a). Finally, we also assess constants of motion.

### 179 **3.1 Numerical solution of the dynamics**

180 To illustrate the differences in the population dynamics described in Eqs. (5) and  
181 (7), we show numerical solutions side by side in Fig. 2.

182 The dynamics in models with constant host and parasite population sizes re-

semble the common Red Queen pattern. Under changing population sizes the system is uncoupled into two independent host-parasite pairs in a pure MA model. As the model deviates from the MA model with increasing  $\alpha$ , the dynamics becomes more complex, since the four population densities of the types  $\mathcal{P}_1$ ,  $\mathcal{P}_2$ ,  $\mathcal{H}_1$ , and  $\mathcal{H}_2$  are coupled.

### 3.2 Stability of boundary fixed points

The fixed points of the system are the points where all population sizes remain constant in time,  $\dot{h}_1 = \dot{h}_2 = \dot{p}_1 = \dot{p}_2 = 0$ . The position of the fixed points and their stability change with changing parameters.

For the Lotka-Volterra dynamics, a trivial fixed point is  $(h_1, h_2, p_1, p_2) = (0, 0, 0, 0)$  where both the hosts and parasites are absent, cf. Eqs. (5). Additionally, extinction of one host and the associated parasite leads to two further fixed points,  $(h_1, h_2, p_1, p_2) = (\frac{d_p}{\sigma}, 0, \frac{b_h}{\sigma}, 0)$  and  $(h_1, h_2, p_1, p_2) = (0, \frac{d_p}{\sigma(1-\alpha\kappa)}, 0, \frac{b_h}{\alpha\gamma(1-\sigma)+\sigma(1-\alpha\kappa(1-\alpha\gamma))})$ .

In gene-for-gene-like models,  $\alpha > 0$ , the susceptible host  $\mathcal{H}_1$  and the virulent  $\mathcal{P}_2$  can coexist in the absence of  $\mathcal{H}_2$  and  $\mathcal{P}_1$ ,  $(h_1, h_2, p_1, p_2) = (\frac{d_p}{\alpha\sigma(1-\alpha\kappa)}, 0, 0, \frac{b_h}{\alpha\sigma(1-\alpha\kappa)})$ .

The opposite case, coexistence between  $\mathcal{H}_2$  and  $\mathcal{P}_1$  in the absence of  $\mathcal{H}_1$  and  $\mathcal{P}_2$  is not possible, as our host-parasite interaction model assumes that the birth rate of  $\mathcal{P}_1$  is zero in the absence of  $\mathcal{H}_1$ . A linear stability analysis of the Lotka-Volterra

201 model shows that all boundary fixed points are unstable for  $\alpha\gamma < \sigma$ . That is, if  
 202 the cost of resistance  $\alpha\gamma$  (which is scaled by the amount of GfG influence) is less  
 203 than the maximum host fitness reduction caused by infection  $\sigma$ , then all host and  
 204 parasite types will coexist.

205 The Replicator Dynamic system, Eq. (7), has four fixed points at the bound-  
 206 aries, each is reflecting fixation of one host and one parasite:  $(h_1, p_1) = (0, 0)$ ,  
 207  $(h_1, p_1) = (1, 0)$ ,  $(h_1, p_1) = (0, 1)$ ,  $(h_1, p_1) = (1, 1)$ . A linear stability analysis  
 208 reveals that all these fixed points are unstable.

### 209 **3.3 Stability of the interior fixed point**

210 In addition to the boundary fixed points, the system has a unique fixed point in  
 211 the interior. In the Lotka-Volterra system, we obtain a non-trivial fixed point of  
 212 the four dimensional dynamical system described in Eqs. (5) when  $\alpha\gamma < \sigma$ . This  
 213 fixed point, where all types coexist, is given by

$$h_1^* = \frac{1}{\sigma} d_p \quad (8a)$$

$$h_2^* = \frac{1}{\sigma} \frac{1 - \alpha(1 - \alpha\kappa)}{1 - \alpha\kappa} d_p$$

$$p_1^* = \frac{1}{\sigma} \frac{\sigma(1 - \alpha)(1 - \alpha\kappa) + \alpha\gamma(1 - \sigma(1 - \alpha\kappa))}{\sigma(1 - \alpha\gamma)(1 - \alpha\kappa) + \alpha\gamma(1 - \alpha(1 - \alpha\kappa))} b_h$$

$$p_2^* = \frac{1}{\sigma} \frac{(\sigma - \alpha\gamma)}{\sigma(1 - \alpha\gamma)(1 - \alpha\kappa) + \alpha\gamma(1 - \alpha(1 - \alpha\kappa))} b_h. \quad (8b)$$

For  $\alpha\gamma > \sigma$ , the resistant host is always disadvantageous because of the high cost of the resistance allele ( $\gamma$ ). Consequently, extinction of  $\mathcal{H}_2$  and  $\mathcal{P}_2$  then becomes a stable fixed point. For  $\alpha\gamma < \sigma$ ,  $h_1^*$  and  $h_2^*$  increase linearly with parasites' death rate  $d_p$ , while  $p_1^*$  and  $p_2^*$  increase linearly with hosts' birth rate  $b_h$ . A linear stability analysis of the interior fixed point (see Appendix A for details) shows that the equilibrium is neutrally stable. Close to the interior fixed point, the system exhibits undamped oscillations. More specifically, the four eigenvalues of the Jacobi-matrix are two distinct pairs of complex conjugates without real parts. This means there are two distinct oscillation frequencies in the system,

$$\frac{1}{2\pi} \sqrt{b_h d_p} \quad \text{and} \quad \frac{m}{2\pi} \sqrt{b_h d_p}, \quad (9)$$

223 where

$$m = \frac{\sqrt{\sigma(1-\alpha)(1-\alpha\kappa) + \alpha\gamma(1-\sigma(1-\alpha\kappa))} \sqrt{1-\alpha(1-\alpha\kappa)}}{\sqrt{\sigma}\sqrt{\sigma(1-\alpha\gamma)(1-\alpha\kappa) + \alpha\gamma(1-\alpha(1-\alpha\kappa))}} \sqrt{\sigma - \alpha\gamma} \quad (10)$$

224 measures the ratio between the two oscillation frequencies. This ratio decreases  
225 when we move away from the MA interaction model. For  $\alpha \approx 0$ , we find

$$m \approx 1 - \alpha \left( 1 + \frac{\gamma}{2\sigma} \right). \quad (11)$$

226 In particular, for the MA model both oscillation frequencies collapse into a single  
227 one. However, all solutions for  $\alpha > 0$  exhibit both of the frequencies (Fig. 3).

228 For the Replicator Dynamics system in which the population size is constant,  
229 the non-trivial fixed point of Eqs. (7) is given by

$$h_1^* = \frac{1 - \alpha\kappa}{2 - \alpha\kappa - \alpha(1 - \alpha\kappa)} \quad (12a)$$

$$p_1^* = \frac{\alpha\gamma(1 - \sigma(1 - \alpha\kappa)) + \sigma(1 - \alpha)(1 - \alpha\kappa)}{\sigma((1 - \alpha\gamma(1 - \alpha\kappa)) + (1 - \alpha)(1 - \alpha\kappa))}. \quad (12b)$$

230 A linear stability analysis shows that the interior fixed point is again neutrally  
231 stable, as the two eigenvalues are a pair of purely imaginary, complex conjugated  
232 numbers when  $\alpha\gamma < \sigma$  (see Appendix B for details). Hence, there is only one



characteristic oscillation frequency of the dynamical system at the fixed point,

$$l = \frac{\sqrt{(1 - \alpha\kappa)(1 - \alpha(1 - \alpha\kappa))(\alpha\gamma(1 - \sigma(1 - \alpha\kappa)) + (1 - \alpha)\sigma(1 - \alpha\kappa))}}{\sqrt{(1 + (1 - \alpha)(1 - \alpha\kappa))(1 - \alpha\gamma(1 - \alpha\kappa) + (1 - \alpha)(1 - \alpha\kappa))}} \frac{\sqrt{\sigma - \alpha\gamma}}{2\pi} \quad (13)$$

$l$  has a maximum value,  $\sigma/(4\pi)$ , in the pure matching-allele model ( $\alpha = 0$ ).

Close to the matching-allele model,  $\alpha \approx 0$ , the oscillation frequency decreases

with increasing  $\alpha$  as

$$l \approx \frac{\sigma}{4\pi} - \frac{\alpha}{16\pi}(2 + \gamma + 2\kappa)\sigma. \quad (14)$$

The solutions around the fixed point exhibit the oscillation frequency described by

Eq. (13). The trajectories are closed circles as shown on the right side of Fig. 3.

### 3.4 Disentangling evolutionary and ecological dynamics

To clarify the ecological effect on the dynamics, particularly at the interior fixed

point, we derive the dynamics of the host and parasite population sizes,  $h = h_1 +$

$h_2$  and  $p = p_1 + p_2$ , and the relative abundance of  $\mathcal{H}_1$  and  $\mathcal{P}_1$  in the population,

$x = h_1/h$  and  $y = p_1/p$ , from Eqs. (3). According to Eqs. (3) the differential

equations for the population sizes of hosts  $h$  and parasites  $p$  are

$$\dot{h} = h(pf(x, y) + b) \quad (15a)$$

$$\dot{p} = p(hg(x, y) - d) \quad (15b)$$

245 where

$$f(x, y) = \mathcal{M}_{11}^h xy + \mathcal{M}_{12}^h x(1 - y) + \mathcal{M}_{21}^h (1 - x)y + \mathcal{M}_{22}^h (1 - x)(1 - y) \quad (16)$$

$$g(x, y) = \mathcal{M}_{11}^p yx + \mathcal{M}_{12}^p y(1 - x) + \mathcal{M}_{21}^p (1 - y)x + \mathcal{M}_{22}^p (1 - y)(1 - x)$$

246 and the differential equations for relative abundances of  $\mathcal{H}_1$  and  $\mathcal{P}_1$  are

$$\dot{x} = px(1 - x)((\mathcal{M}_{11}^h - \mathcal{M}_{21}^h)y + (\mathcal{M}_{12}^h - \mathcal{M}_{22}^h)(1 - y)) \quad (17a)$$

$$\dot{y} = hy(1 - y)((\mathcal{M}_{11}^p - \mathcal{M}_{21}^p)x + (\mathcal{M}_{12}^p - \mathcal{M}_{22}^p)(1 - x)), \quad (17b)$$

247 If  $f(x, y)$  and  $g(x, y)$  are constant in time Eqs. (15) yield simple Lotka-Volterra  
 248 dynamics, while Eqs. (17) result in Replicator Dynamics with rescaled time if the  
 249 population sizes are kept constant.

250 At the interior fixed point one of the oscillation frequencies,  $\sqrt{b_h d_p}/(2\pi)$ ,

251 results solely from Lotka-Volterra dynamics. The other oscillation frequency

$$\frac{\sqrt{b_h d_p}}{2\pi} m = \frac{\sqrt{b_h d_p}}{2\pi} \frac{\sqrt{(\mathcal{M}_{11}^h - \mathcal{M}_{21}^h)(\mathcal{M}_{12}^h - \mathcal{M}_{22}^h)(\mathcal{M}_{11}^p - \mathcal{M}_{21}^p)(\mathcal{M}_{12}^p - \mathcal{M}_{22}^p)}}{\sqrt{(\mathcal{M}_{11}^h \mathcal{M}_{22}^h - \mathcal{M}_{12}^h \mathcal{M}_{21}^h)} \sqrt{(\mathcal{M}_{11}^p \mathcal{M}_{22}^p - \mathcal{M}_{12}^p \mathcal{M}_{21}^p)}} \quad (18)$$

252 (see Eq. (35) in Appendix C) is the product of the oscillation frequency with con-  
253 stant population size

$$l = \frac{\sqrt{(\mathcal{M}_{11}^h - \mathcal{M}_{21}^h)(\mathcal{M}_{12}^h - \mathcal{M}_{22}^h)(\mathcal{M}_{11}^p - \mathcal{M}_{21}^p)(\mathcal{M}_{12}^p - \mathcal{M}_{22}^p)}}{2\pi \sqrt{(\mathcal{M}_{11}^h + \mathcal{M}_{22}^h - \mathcal{M}_{12}^h - \mathcal{M}_{21}^h)(\mathcal{M}_{12}^p + \mathcal{M}_{21}^p - \mathcal{M}_{11}^p - \mathcal{M}_{22}^p)}} \quad (19)$$

254 (see Eq. (39) in Appendix C) and the geometric mean of host and parasite popu-  
255 lation size  $\sqrt{h^* \cdot p^*}$ , i.e.,

$$\frac{m \sqrt{b_h d_p}}{2\pi} = l \sqrt{h^* \cdot p^*}, \quad (20)$$

256 with

$$h^* = \frac{d(\mathcal{M}_{11}^p - \mathcal{M}_{12}^p - \mathcal{M}_{21}^p + \mathcal{M}_{22}^p)}{\mathcal{M}_{11}^p \mathcal{M}_{22}^p - \mathcal{M}_{12}^p \mathcal{M}_{21}^p} \quad (21a)$$

$$p^* = \frac{b(\mathcal{M}_{12}^h + \mathcal{M}_{21}^h - \mathcal{M}_{11}^h - \mathcal{M}_{22}^h)}{\mathcal{M}_{11}^h \mathcal{M}_{22}^h - \mathcal{M}_{12}^h \mathcal{M}_{21}^h} \quad (21b)$$

257 (calculated from Eqs. (32) in Appendix C). Thus, one of the oscillations results

258 purely from ecological interactions, while the other one arises from the combina-  
259 tion of ecology and evolution in our system.

### 260 3.5 Constants of motion

261 The system with constant population size has a constant of motion (Eq. (10.22) in  
262 (Hofbauer and Sigmund, 1998)) given by

$$\begin{aligned}\mathcal{L} = & + (\mathcal{M}_{12}^h - \mathcal{M}_{22}^h) \ln p_1 + (\mathcal{M}_{21}^h - \mathcal{M}_{11}^h) \ln(1 - p_1) \\ & - (\mathcal{M}_{12}^p - \mathcal{M}_{22}^p) \ln h_1 - (\mathcal{M}_{21}^p - \mathcal{M}_{11}^p) \ln(1 - h_1) \\ = & + (\alpha\gamma(1 - \sigma(1 - \alpha\kappa)) + (1 - \alpha)\sigma(1 - \alpha\kappa)) \ln p_1 + (\sigma - \alpha\gamma) \ln(1 - p_1) \\ & + (1 - \alpha\kappa)\sigma \ln h_1 + (1 - \alpha(1 - \alpha\kappa))\sigma \ln(1 - h_1).\end{aligned}\tag{22}$$

263 Due to  $\dot{\mathcal{L}} = 0$ , we obtain sustained oscillations for any initial condition, even far  
264 away from the interior fixed point Eq. (12)

265 The case of changing population size is more intricate. In the case of a match-  
266 ing allele model  $\alpha = 0$ , the two equations decouple and we have two independent  
267 Lotka-Volterra systems with sustained oscillations, characterized by the two con-

268 stants of motion

$$\mathcal{L}_1 = b_h \ln p_1 - \sigma p_1 + d_p \ln h_1 - \sigma h_1 \quad (23a)$$

$$\mathcal{L}_2 = b_h \ln p_2 - \sigma p_2 + d_p \ln h_2 - \sigma h_2. \quad (23b)$$

269 While we do not find a constant of motion for the general case of  $\alpha > 0$ ,  
 270 particular initial conditions can lead to invariants. If the initial condition fulfills

$$\frac{h_1}{h_2} = \frac{\mathcal{M}_{22}^p - \mathcal{M}_{12}^p}{\mathcal{M}_{11}^p - \mathcal{M}_{21}^p} \quad \text{and} \quad (24a)$$

$$\frac{p_1}{p_2} = \frac{\mathcal{M}_{22}^h - \mathcal{M}_{12}^h}{\mathcal{M}_{11}^h - \mathcal{M}_{21}^h} \quad (24b)$$

271 which corresponds to a two-dimensional subspace, then there are two constants  
 272 that remain invariant over time,

$$\mathcal{L}_1 = b_h \ln p_1 + \mathcal{M}_{11}^h p_1 + \mathcal{M}_{12}^h p_2 + d_p \ln h_1 - \mathcal{M}_{11}^p h_1 - \mathcal{M}_{12}^p h_2 \quad (25a)$$

$$\mathcal{L}_2 = b_h \ln p_2 + \mathcal{M}_{21}^h p_1 + \mathcal{M}_{22}^h p_2 + d_p \ln h_2 - \mathcal{M}_{21}^p h_1 - \mathcal{M}_{22}^p h_2. \quad (25b)$$

273 Note that with the condition Eq. (24a) the ratio  $p_1/p_2$  remains constant and with  
 274 the condition Eq. (24b), the ratio  $h_1/h_2$  remains constant. This shows that the

275 nature of the dynamics in this case does not only depend on the choice of parame-  
 276 ters, but also on the initial state of the system, which in principle leads to a further  
 277 complication for the corresponding experimental systems.

## 278 **4 Discussion**

### 279 **4.1 Short overview**

280 Host-parasite interactions are acknowledged as a driving evolutionary force pro-  
 281 moting biological diversity and sexual reproduction (Lively and Apanius, 1995;  
 282 Lively, 2010), with the MA and GfG model being the most popular models to  
 283 describe the genetic interaction for coevolving hosts and parasites (Frank, 1993b;  
 284 Otto and Michalakis, 1998; Lively, 2009; Gokhale et al., 2013; Luijckx et al.,  
 285 2013; Clay and Kover, 1996; Brown and Tellier, 2011). Despite a number of im-  
 286 portant insights provided within their framework, the generality of findings often  
 287 suffers from the complexity of the models employed and, as a consequence, the  
 288 difficulty to fully understand them analytically (Bergelson et al., 2001).

289 In this study, we present a very general yet parsimonious model of host-  
 290 parasite coevolution spanning from MA to GfG with either constant or interaction-  
 291 driven changing population size. Derived analytical solutions revealed that the

coevolution dynamics differs qualitatively between the models with constant and changing population sizes. Apart from the pure MA situation, the well known Red Queen dynamics with trajectories on closed circles is only observed in models with constant population size. This implies that the patterns of host-parasite dynamics to be expected in real biological systems can be much more intricate than suggested by the most popular theoretical models.

## 4.2 Main results and analytical solution

Our study is based on a simplification of the model suggested by Agrawal and Lively (2002) that explores a continuum between the MA and GfG models. We study the model in the context of haplotypes with a single locus, but relax the restriction to constant population size. With a coevolutionary system of two host and two parasite types we achieved an analytical characterization across the entire parameter space. To study ecological effects caused by the victim-exploiter interaction (Tellier and Brown, 2007b) between hosts and parasites, we consider models with changing population size aside of models with constant population size. Under the assumption of constant population size, the dynamics in MA and GfG models appear to be very similar, both showing sustained oscillations with only one oscillation frequency. Yet, introducing changing population size accord-

ing to the Lotka-Volterra equations, we obtain distinct patterns of the population dynamics. For changing population sizes, a single oscillation frequency is present only in the MA model. An additional oscillation frequency arises for all other points on the MA-GfG continuum in that case. In other words, changing population size leads to a much more complex dynamics in GfG-like models, but not in the pure MA model.

In Gokhale et al. (2013) the analysis of allele fixation time for the MA model revealed that Lotka-Volterra dynamics in combination with the associated stochastic effects quickly break down the Red Queen circle. As the dynamics in GfG-like models take a completely different nature with changing population size, the influence of Lotka-Volterra dynamics on the Red Queen circle is yet unclear and remains to be assessed in more detail in the future, especially as our current analysis did not take stochastic effects into account.

### 4.3 Generality of results

To test the generality of our findings we additionally analyzed the interaction matrix suggested by Parker (1994) (Eqs. (36)). There a factor that denotes the fitness reduction of the avirulent parasite encountering the resistant host and an advantage of the virulent parasite meeting the resistant host are assumed in addition.



328 These two parameters together with the costs of resistance and virulence deter-  
 329 mine whether the model is MA or GfG. Again we obtain two distinct oscillation  
 330 frequencies for the population dynamics with changing population sizes in GfG-  
 331 like models (the ratio is shown in Eq. (37) in the Appendix C).

332 Despite the convincing biological relevance of the interaction matrix elements  
 333 in (Agrawal and Lively, 2002), they do not change monotonically on the MA-GfG  
 334 continuum, e.g., with a cost of virulence  $\kappa > 0.5$ ,  $\mathcal{M}_{21}^p$  in Eq. (1) first increases  
 335 then decreases as  $\alpha$  increases from 0 to 1. As an alternative interpolation, we  
 336 therefore also considered interaction matrices that describe a linear transition from  
 337 MA to GfG model, such that

$$\mathcal{M}^h = \begin{matrix} & \mathcal{P}_1 & \mathcal{P}_2 \\ \begin{matrix} \mathcal{H}_1 \\ \mathcal{H}_2 \end{matrix} & \begin{pmatrix} -\sigma & -\alpha(1-\kappa)\sigma \\ -\alpha\gamma & -\alpha\gamma - (1-\alpha\kappa)\sigma \end{pmatrix} \end{matrix} \quad (26a)$$

$$\mathcal{M}^p = \begin{matrix} & \mathcal{H}_1 & \mathcal{H}_2 \\ \begin{matrix} \mathcal{P}_1 \\ \mathcal{P}_2 \end{matrix} & \begin{pmatrix} \sigma & 0 \\ \alpha(1-\kappa)\sigma & (1-\alpha\kappa)\sigma \end{pmatrix} \end{matrix}. \quad (26b)$$

338 The analysis in Appendix D shows that our conclusion also holds for the linear

interpolation. One should keep in mind that both MA and GfG models and even the intermediate models proposed by Parker or Agrawal & Lively or us are only a small subset of the possible models for host-parasite interaction. An observation that will hold for any such model is that as long as the population sizes are kept constant, the population dynamics follows a closed circle with a single oscillation frequency. However, with changing population size a second oscillation frequency arises when the model become GfG-like, which can lead to much more intricate dynamics. For a pure MA model or an inverse MA model (where the diagonal instead of the off-diagonal matrix elements are zero), there still is only one oscillation frequency (see Eqs. (35) in Appendix C).

#### 4.4 Impact of eco-evo feedback in genetically explicit models

In the last two decades it has been realized that evolutionary changes can be faster than previously thought and, thus, occurring on the same time-scale as ecological interactions, especially in case of coevolving hosts and parasites (Hendry and Kinison, 1999; Thompson, 1998; Hairston et al., 2005; Schoener, 2011). Population dynamics can influence the pace of coevolution via so called eco-evolutionary feedbacks, or even give rise to a new type of coevolutionary dynamics as we showed in our study. Interestingly enough, a comprehensive part of the theoretical

studies on eco-evolutionary feedbacks is conducted within the framework of game theory and adaptive dynamics (Hofbauer and Sigmund, 1998; Dieckmann, 2002). In contrast to our model, these approaches usually do not include an explicit definition of genetic interaction between the species, which limits their application for interpreting patterns of genetic variability in natural populations (Day, 2005). Rapid changes in genetic composition may lead to perturbation in host demography and disease dynamics, as was observed for the myxoma virus epidemic in Australian populations of European rabbit (Fenner and Fantini, 1999). Genetic adaptation can improve overall population fitness and "buffer" the unfavorable impact of pathogens (evolutionary rescue) (Gomulkiewicz and Holt, 1995). However population perturbations may constrain adaptability, for example, via enhancing inbreeding, affecting trait heritabilities and disturbing allele composition irrespective of natural selection (O'Brien and Evermann, 1988; Lande, 1988; Gomulkiewicz and Houle, 2009; Saccheri and Hanski, 2006). Thus, models accounting simultaneously for the genetic basis of host-parasite interaction and associated population dynamics may be necessary to fully understand ongoing coevolution among species and the effect it would have on genetic diversity. We are aware of only a few such models (Frank, 1991, 1993a; Gandon et al., 1996; Quigley et al., 2012; Gokhale et al., 2013; Ashby and Gupta, 2014), and most of them confirm

376 that ecological parameters can have a very strong effect on coevolution.

## 377 **4.5 Implications for maintenance of genetic diversity**

378 Numerous field studies identified the presence of comprehensive heritable varia-  
 379 tion in resistance-infectivity patterns for plant and animal populations and their re-  
 380 spective pathogens, suggesting that coevolution acts to maintain genetic diversity  
 381 (Van der Plank, 1984; Thompson and Burdon, 1992; Lively and Apanius, 1995;  
 382 Carius et al., 2001; Wilfert and Jiggins, 2010; Luijckx et al., 2012). However,  
 383 already the first studies, which attempted to explain such variation by cycling dy-  
 384 namics, encountered the problem of stability. This is especially true for the GfG  
 385 model as a parasite with the virulent allele would be quickly fixed, unless hav-  
 386 ing a cost of virulence (Jayakar, 1970; Leonard, 1977; Van der Plank, 1984). In  
 387 addition to the cost, other factors have been examined for their potential role in  
 388 maintaining variation, including epidemiological feedback (May and Anderson,  
 389 1983; Ashby and Gupta, 2014), spatial structure (Frank, 1993a; Gandon et al.,  
 390 1996; Thrall and Burdon, 1997, 2002), genetic drift (Salathé et al., 2005), dif-  
 391 fuse multi-species coevolution (Karasov et al., 2014), models with multiple alleles  
 392 and multiple loci (Sasaki, 2000; Salathé et al., 2005; Tellier and Brown, 2007a).  
 393 Several studies proposed that multiple factors need to act jointly for long-term

coexistence of multiple resisto- and infectotypes (Bergelson et al., 2001). The view of a multifactorial basis of the maintenance of diversity creates an additional challenge for theoretical and empirical studies to disentangle them. As opposed to that, Tellier and Brown (2007b) presented a simple GfG framework showing that the general condition for stability is the presence of direct frequency-dependent selection (where fitness of an allele declines with increasing frequency of that allele itself). In this context, the distinction is made between direct frequency dependence and indirect frequency-dependent selection where fitness is mediated by the frequency of the corresponding antagonist. Direct frequency-dependent selection can be introduced in the model by incorporation of epidemiological or ecological factors (Brown and Tellier, 2011, Table 1). If we introduce a direct frequency-dependent element by applying competitive Lotka-Volterra equations or the concept of empty spaces (Hauert et al., 2006) (implying the existence of a carrying capacity) into our model, the neutrally stable interior fixed point becomes stable. Instead of forming tori or moving along closed circles, the deterministic trajectory spirals inwards. In this case, the oscillation of allele frequencies lasts longer in stochastic simulations, hence the polymorphic state is more stable.

The stability analysis derived the condition for coexistence  $\alpha\gamma < \sigma$ , suggesting that departing from the GfG end of the continuum would increase a range of

parameters at which the oscillation of allele frequencies is maintained. Therefore, patterns of "partial" infectivity by a virulent parasite are more likely to result in cycling dynamics compared to a pure GfG situation. Agrawal and Lively (2002) came to the same conclusion by evaluating computational simulations. This reinforces the importance of exploring dynamics for intermediate points on the MA-GfG continuum, especially as experimental studies provide some examples of such types of interaction (García-Arenal and Fraile, 2013). In contrast to (Tellier and Brown, 2007b) and many other studies (Agrawal and Lively, 2002; Thrall and Burdon, 2002; Tellier and Brown, 2007a), our model is implemented on a continuous time-scale and, therefore, covers host and parasite systems with overlapping generations. Interestingly, it has been proposed that models with discrete generations would favor coevolutionary cycling by synchronizing ecological and epidemiological processes (Ashby and Gupta, 2014), while in (Tellier and Brown, 2007b) the condition for stable cycling is more restrictive for discrete generations when compared to the continuous model.

## 428 **5 Summary**

429 In summary, we have shown that only a small and possibly biased subset of pos-  
 430 sible host-parasite interaction dynamics is captured by the mathematical models  
 431 that assume fixed population size or particular genetics for the interaction, such  
 432 as the MA model. Even in a simple model that allows for a full analytical de-  
 433 scription, the dynamics can vary substantially between subsequent coevolutionary  
 434 cycles. We showed analytically that the complex dynamics found for changing  
 435 population sizes is not a result of choosing a particular interaction matrix. The  
 436 complex pattern is not limited to the set of models considered here, but rather a  
 437 general property of models beyond fixed population size. Our findings highlight  
 438 the importance of the interconnectedness between coevolution and population dy-  
 439 namics, and its potential role in understanding the generation and maintenance of  
 440 genetic variation.

## 441 **Acknowledgements**

442 YS, CSG, and AT acknowledge generous funding by the Max Planck Society.  
 443 AP was funded through grants of the German Science Foundation to HS (DFG  
 444 grants SCHU 1415/8 and SCHU 1415/9 within the German priority programme  
 445 SPP1399 on host-parasite coevolution). AP was additionally supported by the

446 International Max-Planck Research School (IMPRS) for Evolutionary Biology.

## 447 **References**

448 Agrawal, A. and C. M. Lively, 2002. Infection genetics: gene-for-gene versus  
449 matching-alleles models and all points in between. *Evolutionary Ecology Re-*  
450 *search* 4:79–90.

451 Agrawal, A. F. and C. M. Lively, 2003. Modelling infection as a two-step pro-  
452 cess combining gene-for-gene and matching-allele genetics. *Proceedings of the*  
453 *Royal Society B: Biological Sciences* 270:323–334.

454 Altizer, S., D. Harvell, and E. Friedle, 2003. Rapid evolutionary dynamics  
455 and disease threats to biodiversity. *Trends in Ecology & Evolution* 18:589–  
456 596. URL [http://www.sciencedirect.com/science/article/](http://www.sciencedirect.com/science/article/pii/S016953470300260X)  
457 [pii/S016953470300260X](http://www.sciencedirect.com/science/article/pii/S016953470300260X).

458 Ashby, B. and S. Gupta, 2014. Parasitic castration promotes coevolu-  
459 tionary cycling but also imposes a cost on sex. *Evolution* 68:2234–  
460 2244. URL [http://onlinelibrary.wiley.com/doi/10.1111/](http://onlinelibrary.wiley.com/doi/10.1111/evo.12425/abstract)  
461 [evo.12425/abstract](http://onlinelibrary.wiley.com/doi/10.1111/evo.12425/abstract).

462 Bergelson, J., G. Dwyer, and J. J. Emerson, 2001. Models and data on plant-



463 enemy coevolution. *Annual Review of Genetics* 35:469–499. URL [http:](http://dx.doi.org/10.1146/annurev.genet.35.102401.090954)  
464 [//dx.doi.org/10.1146/annurev.genet.35.102401.090954](http://dx.doi.org/10.1146/annurev.genet.35.102401.090954).

465 Brown, J. K. M. and A. Tellier, 2011. Plant-parasite coevolution:  
466 Bridging the gap between genetics and ecology. *Annual Review of*  
467 *Phytopathology* 49:345–367. URL [http://dx.doi.org/10.1146/](http://dx.doi.org/10.1146/annurev-phyto-072910-095301)  
468 [annurev-phyto-072910-095301](http://dx.doi.org/10.1146/annurev-phyto-072910-095301). PMID: 21513455.

469 Carius, H. J., T. J. Little, and D. Ebert, 2001. Genetic variation in a host-  
470 parasite association: potential for coevolution and frequency-dependent selec-  
471 tion. *Evolution* 55:1136–1145. URL [http://onlinelibrary.wiley.](http://onlinelibrary.wiley.com/doi/10.1111/j.0014-3820.2001.tb00633.x/abstract)  
472 [com/doi/10.1111/j.0014-3820.2001.tb00633.x/abstract](http://onlinelibrary.wiley.com/doi/10.1111/j.0014-3820.2001.tb00633.x/abstract).

473 Clay, K. and P. X. Kover, 1996. The red queen hypothesis and plant/pathogen  
474 interactions. *Annual Review of Phytopathology* 34:29–50. URL [http://dx.](http://dx.doi.org/10.1146/annurev.phyto.34.1.29)  
475 [doi.org/10.1146/annurev.phyto.34.1.29](http://dx.doi.org/10.1146/annurev.phyto.34.1.29). PMID: 15012533.

476 Day, T., 2005. Modelling the ecological context of evolutionary change: Déjà  
477 vu or something new? chap. 13 - Modelling the ecological context of evolu-  
478 tionary change, Pp. 273–309, *in* K. Beisner and B. E. Cuddington, eds. *Eco-*  
479 *logical Paradigms Lost, Theoretical Ecology Series*. Academic Press, Burling-

480 ton. URL [http://www.sciencedirect.com/science/article/](http://www.sciencedirect.com/science/article/pii/B9780120884599500157)  
481 [pii/B9780120884599500157](http://www.sciencedirect.com/science/article/pii/B9780120884599500157).

482 Dieckmann, U., 2002. Adaptive dynamics of pathogen-host interactions. Pp.  
483 39–59, in *Adaptive dynamics of infectious diseases: in pursuit of virulence*  
484 *management*, Cambridge Studies in Adaptive Dynamics. Cambridge University  
485 Press. URL [http://dx.doi.org/10.1017/CBO9780511525728.](http://dx.doi.org/10.1017/CBO9780511525728.006)  
486 006.

487 Fenner, F. and B. Fantini, 1999. *Biological Control of Vertebrate Pests. The His-*  
488 *tory of Myxomatosis—an Experiment in Evolution*. CABI Publishing.

489 Flor, H. H., 1956. The complementary genetic systems in flax and flax rust. *Ad-*  
490 *vances in Genetics* 8:29–54.

491 Frank, S. A., 1991. Ecological and genetic models of host-pathogen coevolution.  
492 *Heredity* 67:73–83.

493 ———, 1993a. Coevolutionary genetics of plants and pathogens. *Evolutionary*  
494 *Ecology* 7:45–75. URL [http://link.springer.com/article/10.](http://link.springer.com/article/10.1007/BF01237734)  
495 [1007/BF01237734](http://link.springer.com/article/10.1007/BF01237734).

496 ———, 1993b. Specificity versus detectable polymorphism in host–parasite ge-

497 netics. Proceedings of the Royal Society of London. Series B: Biological Sci-  
498 ences 254:191–197. URL [http://rspb.royalsocietypublishing.](http://rspb.royalsocietypublishing.org/content/254/1341/191.abstract)  
499 [org/content/254/1341/191.abstract](http://rspb.royalsocietypublishing.org/content/254/1341/191.abstract).

500 Gandon, S., Y. Capowiez, Y. Dubois, Y. Michalakis, and I. Olivieri,  
501 1996. Local adaptation and gene-for-gene coevolution in a metapopu-  
502 lation model. Proceedings of the Royal Society B: Biological Sciences  
503 263:1003–1009. URL [http://rspb.royalsocietypublishing.](http://rspb.royalsocietypublishing.org/content/263/1373/1003)  
504 [org/content/263/1373/1003](http://rspb.royalsocietypublishing.org/content/263/1373/1003).

505 García-Arenal, F. and A. Fraile, 2013. Trade-offs in host range evolution of plant  
506 viruses. Plant Pathology 62:2–9. URL [http://onlinelibrary.wiley.](http://onlinelibrary.wiley.com/doi/10.1111/ppa.12104/abstract)  
507 [com/doi/10.1111/ppa.12104/abstract](http://onlinelibrary.wiley.com/doi/10.1111/ppa.12104/abstract).

508 Gladieux, P., E. J. Byrnes, G. Aguileta, M. C. Fisher, J. Heitman, and T. Giraud,  
509 2011. Epidemiology and evolution of fungal pathogens in plants and animals.  
510 Pp. 59–132, *in* Genetics and Evolution of Infectious Disease. Elsevier. URL  
511 <https://scholars.duke.edu/display/pub965195>.

512 Gokhale, C. S., A. Papkou, A. Traulsen, and H. Schulenburg, 2013. Lotka-Volterra  
513 dynamics kills the Red Queen: population size fluctuations and associated

514 stochasticity dramatically change host-parasite coevolution. *BMC Evolutionary*  
515 *Biology* 13:254.

516 Gomulkiewicz, R. and R. D. Holt, 1995. When does evolution by natural selection  
517 prevent extinction? *Evolution* 49:201.

518 Gomulkiewicz, R. and D. Houle, 2009. Demographic and genetic constraints on  
519 evolution. *The American Naturalist* 174:E218–E229. URL [http://www.](http://www.jstor.org/stable/10.1086/645086)  
520 [jstor.org/stable/10.1086/645086](http://www.jstor.org/stable/10.1086/645086).

521 Grosberg, R. K. and M. W. Hart, 2000. Mate selection and the evolution of highly  
522 polymorphic self/nonself recognition genes. *Science* 289:2111–2114.

523 Hairston, N. G., S. P. Ellner, M. A. Geber, T. Yoshida, and J. A. Fox, 2005.  
524 Rapid evolution and the convergence of ecological and evolutionary time. *Ecol-*  
525 *ogy Letters* 8:1114–1127. URL [http://onlinelibrary.wiley.com/](http://onlinelibrary.wiley.com/doi/10.1111/j.1461-0248.2005.00812.x/abstract)  
526 [doi/10.1111/j.1461-0248.2005.00812.x/abstract](http://onlinelibrary.wiley.com/doi/10.1111/j.1461-0248.2005.00812.x/abstract).

527 Hauert, C., M. Holmes, and M. Doebeli, 2006. Evolutionary games and popula-  
528 tion dynamics: maintenance of cooperation in public goods games. *Proceedings*  
529 *of the Royal Society B* 273:2565–2570.

- 530 Hendry, A. P. and M. T. Kinnison, 1999. Perspective: The pace of modern life:  
531 Measuring rates of contemporary microevolution. *Evolution* 53:1637.
- 532 Hofbauer, J. and K. Sigmund, 1998. *Evolutionary Games and Population Dynam-*  
533 *ics*. Cambridge University Press, Cambridge.
- 534 Jayakar, S. D., 1970. A mathematical model for interaction of gene fre-  
535 quencies in a parasite and its host. *Theoretical population biology* 1:140–  
536 164. URL [http://www.sciencedirect.com/science/article/](http://www.sciencedirect.com/science/article/pii/0040580970900328)  
537 [pii/0040580970900328](http://www.sciencedirect.com/science/article/pii/0040580970900328).
- 538 Jones, J. D. G. and J. L. Dangl, 2006. The plant immune system. *Nature* 444:323–  
539 329.
- 540 Karasov, T. L., J. M. Kniskern, L. Gao, B. J. DeYoung, J. Ding, U. Du-  
541 biella, R. O. Lastra, S. Nallu, F. Roux, R. W. Innes, L. G. Barrett, R. R.  
542 Hudson, and J. Bergelson, 2014. The long-term maintenance of a resis-  
543 tance polymorphism through diffuse interactions. *Nature advance online pub-*  
544 *lication*. URL [http://www.nature.com/nature/journal/vaop/](http://www.nature.com/nature/journal/vaop/ncurrent/full/nature13439.html)  
545 [ncurrent/full/nature13439.html](http://www.nature.com/nature/journal/vaop/ncurrent/full/nature13439.html).
- 546 Lande, R., 1988. Genetics and demography in biological conservation. *Science*  
547 241:1455–1460.

- 548 Leonard, K. J., 1977. Selection pressures and plant pathogens. *Annals of the New*  
549 *York Academy of Sciences* 287:207–222.
- 550 ———, 1994. Stability of equilibria in a gene-for-gene coevolution model of  
551 host-parasite interactions. *Phytopathology* 84:70–77.
- 552 Lively, C. M., 2009. The maintenance of sex: host–parasite coevolution  
553 with density-dependent virulence. *Journal of Evolutionary Biology* 22:2086–  
554 2093. URL [http://dx.doi.org/10.1111/j.1420-9101.2009.](http://dx.doi.org/10.1111/j.1420-9101.2009.01824.x)  
555 [01824.x](http://dx.doi.org/10.1111/j.1420-9101.2009.01824.x).
- 556 ———, 2010. A review of red queen models for the persistence of obligate sexual  
557 reproduction. *Journal of Heredity* 101:S13–S20. URL [http://jhered.](http://jhered.oxfordjournals.org/content/101/suppl_1/S13.abstract)  
558 [oxfordjournals.org/content/101/suppl\\_1/S13.abstract](http://jhered.oxfordjournals.org/content/101/suppl_1/S13.abstract).
- 559 Lively, C. M. and V. Apanius, 1995. Genetic diversity in host-parasite interactions.  
560 Pp. 421–449, *in Ecology of infectious diseases in natural populations*, vol. 7.  
561 Cambridge University Press.
- 562 Luijckx, P., H. Fienberg, D. Duneau, and D. Ebert, 2012. Resistance to a bacterial  
563 parasite in the crustacean *daphnia magna* shows mendelian segregation with  
564 dominance. *Heredity* 108:547–551. URL [http://www.nature.com/](http://www.nature.com/hdy/journal/v108/n5/full/hdy2011122a.html)  
565 [hdy/journal/v108/n5/full/hdy2011122a.html](http://www.nature.com/hdy/journal/v108/n5/full/hdy2011122a.html).

- 566 ———, 2013. A Matching-Allele Model Explains Host Resistance to Parasites.  
567 *Current Biology* 23:1085–1088.
- 568 May, R. M. and R. M. Anderson, 1983. Epidemiology and genetics in the coevolu-  
569 tion of parasites and hosts. *Proceedings of the Royal Society B: Biological Sci-*  
570 *ences* 219:281–313. URL [http://rspb.royalsocietypublishing.](http://rspb.royalsocietypublishing.org/cgi/doi/10.1098/rspb.1983.0075)  
571 [org/cgi/doi/10.1098/rspb.1983.0075](http://rspb.royalsocietypublishing.org/cgi/doi/10.1098/rspb.1983.0075).
- 572 O’Brien, S. J. and J. F. Evermann, 1988. Interactive influence of infectious disease  
573 and genetic diversity in natural populations. *Trends in Ecology and Evolution*  
574 3:254–259.
- 575 Otto, S. P. and Y. Michalakis, 1998. The evolution of recombination  
576 in changing environments. *Trends in Ecology & Evolution* 13:145 –  
577 151. URL [http://www.sciencedirect.com/science/article/](http://www.sciencedirect.com/science/article/pii/S0169534797012603)  
578 [pii/S0169534797012603](http://www.sciencedirect.com/science/article/pii/S0169534797012603).
- 579 Parker, M. A., 1994. Pathogens and sex in plants. *Evol Ecol* 8:560–584. URL  
580 <http://link.springer.com/article/10.1007/BF01238258>.
- 581 Van der Plank, J. E., 1984. *Disease Resistance in Plants*. 2nd revised edition  
582 edition ed. Academic Press Inc, Orlando.

- 583 Quigley, B. J. Z., D. García López, A. Buckling, A. J. McKane, and S. P.  
584 Brown, 2012. The mode of host-parasite interaction shapes coevolution-  
585 ary dynamics and the fate of host cooperation. *Proceedings of the Royal*  
586 *Society B: Biological Sciences* 279:3742–3748. URL [http://rspb.](http://rspb.royalsocietypublishing.org/content/279/1743/3742)  
587 [royalsocietypublishing.org/content/279/1743/3742](http://rspb.royalsocietypublishing.org/content/279/1743/3742).
- 588 Saccheri, I. and I. Hanski, 2006. Natural selection and population dynamics.  
589 *Trends in Ecology & Evolution* 21:341–347. URL [http://linkinghub.](http://linkinghub.elsevier.com/retrieve/pii/S0169534706001054)  
590 [elsevier.com/retrieve/pii/S0169534706001054](http://linkinghub.elsevier.com/retrieve/pii/S0169534706001054).
- 591 Salathé, M., A. Scherer, and S. Bonhoeffer, 2005. Neutral drift and polymorphism  
592 in gene-for-gene systems. *Ecology Letters* 8:925–932.
- 593 Sardanyés, J. and R. V. Solé, 2008. Matching allele dynamics and coevolution in  
594 a minimal predator–prey replicator model. *Physics Letters A* 372:341–350.
- 595 Sasaki, A., 2000. Host-parasite coevolution in a multilocus gene-for-  
596 gene system. *Proceedings of the Royal Society B: Biological Sciences*  
597 267:2183–2188. URL [http://rspb.royalsocietypublishing.](http://rspb.royalsocietypublishing.org/content/267/1458/2183)  
598 [org/content/267/1458/2183](http://rspb.royalsocietypublishing.org/content/267/1458/2183).
- 599 Schoener, T. W., 2011. The newest synthesis: Understanding the interplay of



600 evolutionary and ecological dynamics. *Science* 331:426–429. URL [http:](http://www.sciencemag.org/content/331/6016/426.abstract)  
601 [//www.sciencemag.org/content/331/6016/426.abstract](http://www.sciencemag.org/content/331/6016/426.abstract).

602 Schuster, P. and K. Sigmund, 1983. Replicator dynamics. *Journal of Theoretical*  
603 *Biology* 100:533–538.

604 Strogatz, S., 2000. *Nonlinear Dynamics and Chaos: With Applications to Physics,*  
605 *Biology, Chemistry, and Engineering (Studies in Nonlinearity)*. Westview Pr.

606 Taylor, P. D. and L. Jonker, 1978. Evolutionarily stable strategies and game dy-  
607 namics. *Mathematical Biosciences* 40:145–156.

608 Tellier, A. and J. K. M. Brown, 2007a. Polymorphism in multilocus host-parasite  
609 coevolutionary interactions. *Genetics* 177:1777–1790.

610 ———, 2007b. Stability of genetic polymorphism in host-parasite in-  
611 teractions. *Proceedings of the Royal Society B: Biological Sciences*  
612 274:809–817. URL [http://rspb.royalsocietypublishing.org/](http://rspb.royalsocietypublishing.org/content/274/1611/809)  
613 [content/274/1611/809](http://rspb.royalsocietypublishing.org/content/274/1611/809).

614 Thompson, J. N., 1998. Rapid evolution as an ecological process. *Trends in*  
615 *Ecology & Evolution* 13:329–332. URL [http://www.sciencedirect.](http://www.sciencedirect.com/science/article/pii/S0169534798013780)  
616 [com/science/article/pii/S0169534798013780](http://www.sciencedirect.com/science/article/pii/S0169534798013780).

- 617 Thompson, J. N. and J. J. Burdon, 1992. Gene-for-gene coevolution between  
618 plants and parasites. *Nature* 360:121–125. URL <http://www.nature.com/nature/journal/v360/n6400/abs/360121a0.html>.  
619
- 620 Thompson, R. C. A., A. J. Lymbery, and A. Smith, 2010. Parasites, emerg-  
621 ing disease and wildlife conservation. *International Journal for Parasitology*  
622 40:1163–1170. URL <http://www.sciencedirect.com/science/article/pii/S0020751910001554>.  
623
- 624 Thrall, P. H. and J. J. Burdon, 1997. Host-pathogen dynamics in a metapopulation  
625 context: The ecological and evolutionary consequences of being spatial. *Jour-  
626 nal of Ecology* 85:743–753. URL [http://www.jstor.org/stable/](http://www.jstor.org/stable/2960598)  
627 2960598.
- 628 ———, 2002. Evolution of gene-for-gene systems in metapopulations: the ef-  
629 fect of spatial scale of host and pathogen dispersal. *Plant Pathology* 51:169–  
630 184. URL [http://onlinelibrary.wiley.com/doi/10.1046/j.](http://onlinelibrary.wiley.com/doi/10.1046/j.1365-3059.2002.00683.x/abstract)  
631 1365-3059.2002.00683.x/abstract.
- 632 Traulsen, A., J. C. Claussen, and C. Hauert, 2005. Coevolutionary dynamics:  
633 From finite to infinite populations. *Physical Review Letters* 95:238701.
- 634 Wilfert, L. and F. M. Jiggins, 2010. Host-parasite coevolution: genetic variation

635 in a virus population and the interaction with a host gene. *Journal of Evolu-*  
636 *tionary Biology* 23:1447–1455. URL [http://onlinelibrary.wiley.](http://onlinelibrary.wiley.com/doi/10.1111/j.1420-9101.2010.02002.x/abstract)  
637 [com/doi/10.1111/j.1420-9101.2010.02002.x/abstract](http://onlinelibrary.wiley.com/doi/10.1111/j.1420-9101.2010.02002.x/abstract).

638 Woolhouse, M. E. J., D. T. Haydon, and R. Antia, 2005. Emerging pathogens:  
639 the epidemiology and evolution of species jumps. *Trends in Ecology & Evolu-*  
640 *tion* 20:238–244. URL [http://www.sciencedirect.com/science/](http://www.sciencedirect.com/science/article/pii/S0169534705000388)  
641 [article/pii/S0169534705000388](http://www.sciencedirect.com/science/article/pii/S0169534705000388).

642 Woolhouse, M. E. J., J. Webster, E. Domingo, B. Charlesworth, and B. Levin,  
643 2002. Biological and biomedical implications of the co-evolution of pathogens  
644 and their hosts. *Nature Genetics* 32:569–577.

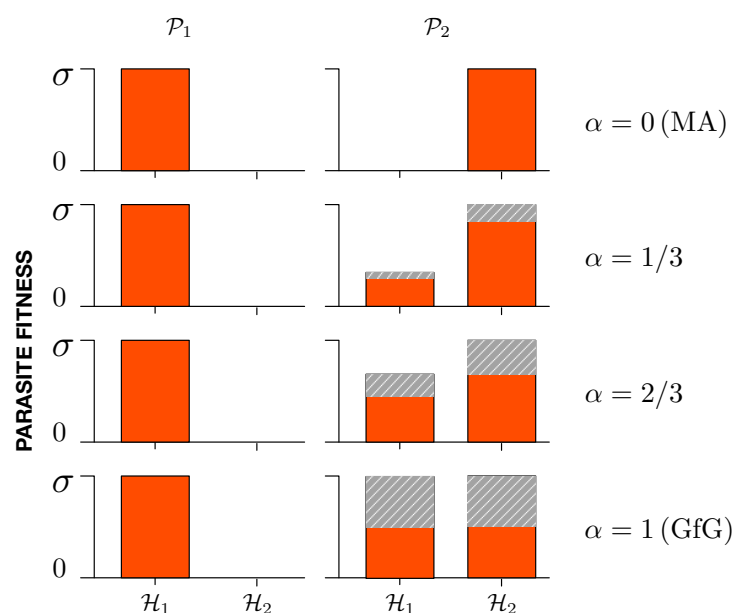

Figure 1: Fitness of avirulent parasite  $\mathcal{P}_1$  and virulent parasite  $\mathcal{P}_2$  on the two hosts  $\mathcal{H}_1$  and  $\mathcal{H}_2$  for the matching-allele model ( $\alpha = 0$ , top), the gene-for-gene model ( $\alpha = 1$ , bottom), and two intermediate models ( $\alpha = 1/3$  and  $\alpha = 2/3$ ). Gray areas represent the fitness reduction for  $\mathcal{P}_2$  due to the cost of virulence  $\kappa = 1/2$ , which is  $\alpha\kappa\sigma$  in  $\mathcal{H}_2$  (Eq. (1b)), hence,  $\sigma/2$  in GfG model. In  $\mathcal{H}_1$  the fitness reduction for  $\mathcal{P}_2$  due to the cost of virulence is  $\alpha^2\kappa\sigma$ .

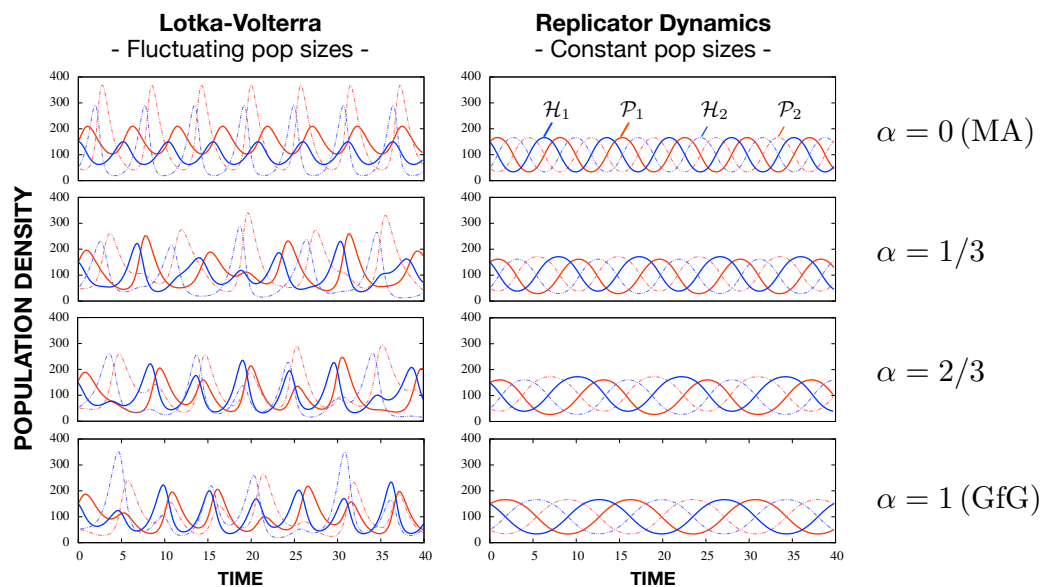

Figure 2: Example of population dynamics based on the Lotka-Volterra equations (left) and the Replicator Dynamics (right). While the dynamics on the right side resembles the common Red Queen pattern, the left side is more complex. In a pure matching-allele model (top), the plot on the left shows two independent sets of Lotka-Volterra dynamics, one for  $\mathcal{H}_1$  and  $\mathcal{P}_1$  (blue and red solid lines, correspondingly) and a second one for  $\mathcal{H}_2$  and  $\mathcal{P}_2$  (blue and red dotted lines). As the model deviates from MA model with increasing  $\alpha$  (rows 2-4) more complicated dynamics arise, since the four population densities of  $\mathcal{H}_1$ ,  $\mathcal{H}_2$ ,  $\mathcal{P}_1$ , and  $\mathcal{P}_2$  are coupled (parameters  $\gamma = 0.005$ ,  $\kappa = 0.5$ , and  $\sigma = 0.01$  for both Lotka-Volterra and Replicator Dynamics. Host birth rate  $b_h = 1.5$  and parasite death rate  $d_p = 1.0$  in the Lotka-Volterra case. Initial population densities  $h_1 = p_1 = 150$ ,  $h_2 = p_2 = 50$ ).

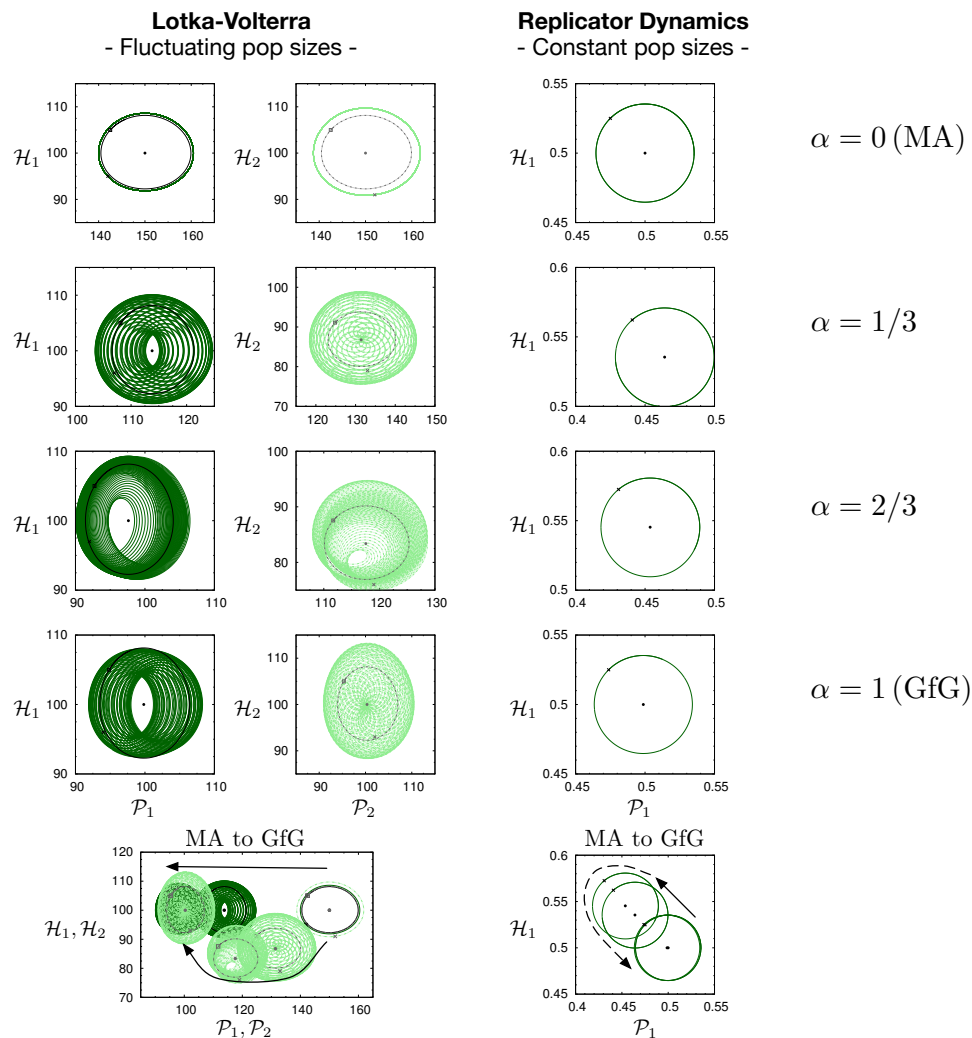

**Figure 3:** Trajectories close to the interior fixed points (black points) on the  $h_1 - p_1$  plane (dark green solid lines both for LV and RD equations) and the  $h_2 - p_2$  plane (light green dashed lines LV only). The black crosses mark the initial conditions. The black rectangle represent a special set of initial condition while the black solid/dashed lines show the corresponding trajectories. With Replicator Dynamics the  $h_1 - p_1$  trajectory is a closed circle. With Lotka-Volterra dynamics, the trajectories are closed circle when the initial conditions fulfill Eq. (24) (black lines). For the closed circles (black in LV and green in RD) the initial host population densities,  $h_1$  and  $h_2$  are 5% above the corresponding fixed point, while the parasite population densities are 5% beneath the fixed point. Except for  $\alpha = 0$  (MA) the green trajectories with LV resemble tori instead of closed circles, an implication for two oscillation frequencies. To show the shift of the interior fixed point as  $\alpha$  increases from 0 to 1, the trajectories are plotted all in the same coordinate system at the bottom.

## 645 A Stability of the interior fixed point in the Lotka- 646 Volterra dynamics

647 In order to analyse the system at the interior fixed point  $(h_1^*, h_2^*, p_1^*, p_2^*)$ , we first  
648 linearise the system around this point. For general points  $(h_1, h_2, p_1, p_2)$ , the lin-  
649 earised system is given by by the Jacobian matrix  $J(h_1, h_2, p_1, p_2) =$

$$\begin{pmatrix} b_h - p_1\sigma - p_2\alpha(1-\alpha\kappa)\sigma & 0 & -h_1\sigma & -h_1\alpha(1-\alpha\kappa)\sigma \\ 0 & b_h - p_1\alpha\gamma + p_2((1-\alpha\gamma)(1-(1-\alpha\kappa)\sigma)-1) & -h_2\alpha\gamma & h_2((1-\alpha\gamma)(1-(1-\alpha\kappa)\sigma)-1) \\ p_1\sigma & 0 & h_1\sigma - d_p & 0 \\ p_2\alpha(1-\alpha\kappa)\sigma & p_2(1-\alpha\kappa)\sigma & 0 & (h_2(1-\alpha\kappa) + h_1\alpha(1-\alpha\kappa))\sigma - d_p \end{pmatrix}.$$

650 At the interior fixed point  $(h_1^*, h_2^*, p_1^*, p_2^*)$ , we have  $J(h_1^*, h_2^*, p_1^*, p_2^*) =$

$$\begin{pmatrix} 0 & 0 & -d_p & d_p\alpha(\alpha\kappa-1) \\ 0 & 0 & \frac{d_p\alpha\gamma(\alpha(\alpha\kappa-1)+1)}{(\alpha\kappa-1)\sigma} & \frac{d_p(\alpha(\alpha\kappa-1)+1)(\alpha\gamma+(\alpha\gamma-1)(\alpha\kappa-1)\sigma)}{(\alpha\kappa-1)\sigma} \\ \frac{b_h(\alpha\gamma+(\gamma\alpha+\alpha-1)(\alpha\kappa-1)\sigma)}{\alpha\gamma(\alpha(\alpha\kappa-1)+1)+(\alpha\gamma-1)(\alpha\kappa-1)\sigma} & 0 & 0 & 0 \\ \frac{b_h\alpha(1-\alpha\kappa)(\sigma-\alpha\gamma)}{\alpha\gamma(\alpha(\alpha\kappa-1)+1)+(\alpha\gamma-1)(\alpha\kappa-1)\sigma} & \frac{b_h(1-\alpha\kappa)(\sigma-\alpha\gamma)}{\alpha\gamma(\alpha(\alpha\kappa-1)+1)+(\alpha\gamma-1)(\alpha\kappa-1)\sigma} & 0 & 0 \end{pmatrix}. \quad (27)$$

651 The eigenvalues of this matrix determine linear stability at the fixed point (Stro-  
652 gatz, 2000). If there is at least one eigenvalue with positive real part, the point  
653 would be unstable. If all eigenvalues have negative real parts, the point would be

stable. In our case, the four eigenvalues are

$$\begin{aligned}\Lambda_{1,2} &= \pm i\sqrt{b_h d_p} \quad \text{and} \\ \Lambda_{3,4} &= \pm \frac{\sqrt{b_h d_p} \sqrt{\sigma(1-\alpha)(1-\alpha\kappa) + \alpha\gamma(1-\sigma(1-\alpha\kappa))} \sqrt{1-\alpha(1-\alpha\kappa)}}{\sqrt{\sigma} \sqrt{\sigma(1-\alpha\gamma)(1-\alpha\kappa) + \alpha\gamma(1-\alpha(1-\alpha\kappa))}} \sqrt{\alpha\gamma - \sigma},\end{aligned}\tag{28}$$

Except the term  $\sqrt{\alpha\gamma - \sigma}$ , the remaining factors in  $\Lambda_{3,4}$  are positive. For  $\alpha\gamma > \sigma$ , allele  $\mathcal{H}_1$  is always beneficial. Consequently, the fixed point is unstable as one of the eigenvalues  $\Lambda_3$  or  $\Lambda_4$  is positive. For  $\alpha\gamma < \sigma$ , the fixed point is a center with neutral stability as all eigenvalues are purely imaginary. Only the case of  $\alpha\gamma < \sigma$  is of further interest in this manuscript, as the result is straightforward in the opposite case.

## B Stability of the interior fixed point in the Replicator Dynamics

For the system with constant population size, the Jacobian matrix in general is

$$J(h_1, p_1) =$$

$$\begin{pmatrix} (1-2h_1)(\alpha(\gamma-\sigma(1-p_1)(\gamma+(-\gamma\alpha-\alpha+1)\kappa+1))-2p_1\sigma+\sigma) & \sigma h_1(1-h_1)(-\kappa(\gamma+1)\alpha^2+(\gamma+\kappa+1)\alpha-2) \\ \sigma p_1(1-p_1)(-(1-\alpha)\kappa\alpha-\alpha+2) & \sigma(1-2p_1)(h_1(-\kappa(1-\alpha)\alpha-\alpha+2)+\alpha\kappa-1) \end{pmatrix}.$$



At the interior fixed point  $(h_1^*, p_1^*)$ , the matrix is given by  $J(h_1^*, p_1^*) =$

$$\begin{pmatrix} 0 & \frac{(\alpha\kappa-1)((\gamma+1)\kappa\alpha^2-(\gamma+\kappa+1)\alpha+2)(\alpha(\alpha\kappa-1)+1)\sigma}{((\alpha-1)\kappa\alpha-\alpha+2)^2} \\ -\frac{((\alpha-1)\kappa\alpha-\alpha+2)(\alpha\gamma-\sigma)(\alpha\gamma+(\gamma\alpha+\alpha-1)(\alpha\kappa-1)\sigma)}{((\gamma+1)\kappa\alpha^2-(\gamma+\kappa+1)\alpha+2)^2\sigma} & 0 \end{pmatrix}. \quad (29)$$

The eigenvalues are

$$\Lambda_{1,2} = \mp i \frac{\sqrt{(1-\alpha\kappa)(1-\alpha(1-\alpha\kappa))(\alpha\gamma(1-\sigma(1-\alpha\kappa))+(1-\alpha)\sigma(1-\alpha\kappa))}}{\sqrt{(1+(1-\alpha)(1-\alpha\kappa))(1-\alpha\gamma(1-\alpha\kappa)+(1-\alpha)(1-\alpha\kappa))}} \sqrt{\sigma-\alpha\gamma}. \quad (30)$$

For  $\alpha\gamma < \sigma$ , the eigenvalues are purely imaginary, hence, the fixed point is a neutral center.

## C Stability of the interior fixed point for general interaction matrices

The appearance of the second oscillation frequency at the interior fixed point in gene-for-gene-like models with changing population sizes does not depend on the exact choice of the interaction matrices in Eq. (2). To show this, we recalculate the interior fixed point and apply linear stability analysis on interaction matrices

675 of a general form,

$$\mathcal{M}^h = \begin{matrix} & \mathcal{P}_1 & \mathcal{P}_2 \\ \mathcal{H}_1 & \begin{pmatrix} \mathcal{M}_{11}^h & \mathcal{M}_{12}^h \\ \mathcal{M}_{21}^h & \mathcal{M}_{22}^h \end{pmatrix} \\ \mathcal{H}_2 & \end{matrix} \quad (31a)$$

$$\mathcal{M}^p = \begin{matrix} & \mathcal{H}_1 & \mathcal{H}_2 \\ \mathcal{P}_1 & \begin{pmatrix} \mathcal{M}_{11}^p & \mathcal{M}_{12}^p \\ \mathcal{M}_{21}^p & \mathcal{M}_{22}^p \end{pmatrix} \\ \mathcal{P}_2 & \end{matrix}. \quad (31b)$$

676 The interior fixed point for our host parasite system with Lotka-Volterra dynamics

677 (Eq. (3)) is then

$$h_1^* = \frac{\mathcal{M}_{12}^p - \mathcal{M}_{22}^p}{\mathcal{M}_{12}^p \mathcal{M}_{21}^p - \mathcal{M}_{11}^p \mathcal{M}_{22}^p} d_p \quad (32a)$$

$$h_2^* = \frac{\mathcal{M}_{21}^p - \mathcal{M}_{11}^p}{\mathcal{M}_{12}^p \mathcal{M}_{21}^p - \mathcal{M}_{11}^p \mathcal{M}_{22}^p} d_p$$

$$p_1^* = \frac{\mathcal{M}_{12}^h - \mathcal{M}_{22}^h}{\mathcal{M}_{11}^h \mathcal{M}_{22}^h - \mathcal{M}_{12}^h \mathcal{M}_{21}^h} b_h \quad (32b)$$

$$p_2^* = \frac{\mathcal{M}_{21}^h - \mathcal{M}_{11}^h}{\mathcal{M}_{11}^h \mathcal{M}_{22}^h - \mathcal{M}_{12}^h \mathcal{M}_{21}^h} b_h.$$

678 The Jacobian matrix at any defined point is  $J(h_1, h_2, p_1, p_2) =$

$$\begin{pmatrix} b_h + \mathcal{M}_{11}^h p_1 + \mathcal{M}_{12}^h p_2 & 0 & h_1 \mathcal{M}_{11}^h & h_1 \mathcal{M}_{12}^h \\ 0 & b_h + \mathcal{M}_{21}^h p_1 + \mathcal{M}_{22}^h p_2 & h_2 \mathcal{M}_{21}^h & h_2 \mathcal{M}_{22}^h \\ \mathcal{M}_{11}^p p_1 & \mathcal{M}_{12}^h p_1 & -d_p + h_1 \mathcal{M}_{11}^p + h_2 \mathcal{M}_{12}^p & 0 \\ \mathcal{M}_{21}^p p_2 & \mathcal{M}_{22}^p p_2 & 0 & -d_p + h_1 \mathcal{M}_{21}^p + h_2 \mathcal{M}_{22}^p \end{pmatrix}. \quad (33)$$

679 At the interior fixed point  $(h_1^*, h_2^*, p_1^*, p_2^*)$ , we now have

$$J(h_1^*, h_2^*, p_1^*, p_2^*) = \begin{pmatrix} 0 & 0 & \frac{\mathcal{M}_{11}^h (\mathcal{M}_{12}^p - \mathcal{M}_{22}^p) d_p}{\mathcal{M}_{12}^p \mathcal{M}_{21}^p - \mathcal{M}_{11}^p \mathcal{M}_{22}^p} & \frac{\mathcal{M}_{12}^h (\mathcal{M}_{12}^p - \mathcal{M}_{22}^p) d_p}{\mathcal{M}_{12}^p \mathcal{M}_{21}^p - \mathcal{M}_{11}^p \mathcal{M}_{22}^p} \\ 0 & 0 & \frac{\mathcal{M}_{21}^h (\mathcal{M}_{11}^p - \mathcal{M}_{21}^p) d_p}{\mathcal{M}_{11}^p \mathcal{M}_{22}^p - \mathcal{M}_{12}^p \mathcal{M}_{21}^p} & \frac{\mathcal{M}_{22}^h (\mathcal{M}_{11}^p - \mathcal{M}_{21}^p) d_p}{\mathcal{M}_{11}^p \mathcal{M}_{22}^p - \mathcal{M}_{12}^p \mathcal{M}_{21}^p} \\ \frac{\mathcal{M}_{11}^p (\mathcal{M}_{12}^h - \mathcal{M}_{22}^h) b_h}{\mathcal{M}_{11}^h \mathcal{M}_{22}^h - \mathcal{M}_{12}^h \mathcal{M}_{21}^h} & \frac{\mathcal{M}_{12}^p (\mathcal{M}_{12}^h - \mathcal{M}_{22}^h) b_h}{\mathcal{M}_{11}^h \mathcal{M}_{22}^h - \mathcal{M}_{12}^h \mathcal{M}_{21}^h} & 0 & 0 \\ \frac{\mathcal{M}_{21}^p (\mathcal{M}_{21}^h - \mathcal{M}_{11}^h) b_h}{\mathcal{M}_{11}^h \mathcal{M}_{22}^h - \mathcal{M}_{12}^h \mathcal{M}_{21}^h} & \frac{\mathcal{M}_{22}^p (\mathcal{M}_{21}^h - \mathcal{M}_{11}^h) b_h}{\mathcal{M}_{11}^h \mathcal{M}_{22}^h - \mathcal{M}_{12}^h \mathcal{M}_{21}^h} & 0 & 0 \end{pmatrix}. \quad (34)$$

680 There are four eigenvalues

$$\Lambda_{1,2} = \pm i \sqrt{b_h d_p} \quad \text{and} \quad (35)$$

$$\Lambda_{3,4} = \pm i \frac{\sqrt{b_h d_p} \sqrt{(\mathcal{M}_{11}^h - \mathcal{M}_{21}^h)(\mathcal{M}_{12}^h - \mathcal{M}_{22}^h)(\mathcal{M}_{11}^p - \mathcal{M}_{21}^p)(\mathcal{M}_{12}^p - \mathcal{M}_{22}^p)}}{\sqrt{(\mathcal{M}_{11}^h \mathcal{M}_{22}^h - \mathcal{M}_{12}^h \mathcal{M}_{21}^h)} \sqrt{(\mathcal{M}_{11}^p \mathcal{M}_{22}^p - \mathcal{M}_{12}^p \mathcal{M}_{21}^p)}}.$$

681 It is often assumed that (i)  $\mathcal{M}_{11}^h < \mathcal{M}_{21}^h \leq 0$  ( $\mathcal{H}_2$  is beneficial if there is only  $\mathcal{P}_1$   
 682 in the population), (ii)  $\mathcal{M}_{22}^h < \mathcal{M}_{12}^h \leq 0$  ( $\mathcal{H}_1$  is beneficial if there is only  $\mathcal{P}_2$  in  
 683 the population), (iii)  $\mathcal{M}_{11}^p > \mathcal{M}_{21}^p \geq 0$  ( $\mathcal{P}_1$  is beneficial if there is only  $\mathcal{H}_1$  in the

684 population), and (iv)  $\mathcal{M}_{22}^p > \mathcal{M}_{12}^p \geq 0$  ( $\mathcal{P}_1$  is beneficial if there is only  $\mathcal{H}_1$  in the  
 685 population). With these minimal assumptions the eigenvalues are pure imaginary,  
 686 i.e., the interior fixed point is a neutrally stable center. The ratio between the  
 687 eigenvalues, which determines the oscillation frequencies at the center, differs in  
 688 different interaction models. For example, in Parker (Parker, 1994) the interaction  
 689 matrices for haploid types are

$$\mathcal{M}^h = \begin{matrix} & \mathcal{P}_1 & \mathcal{P}_2 \\ \begin{matrix} \mathcal{H}_1 \\ \mathcal{H}_2 \end{matrix} & \begin{pmatrix} -\sigma & -(1-\kappa)\sigma \\ -\gamma - \sigma(1-\tau) & -\sigma(\alpha - \kappa + 1) - \gamma \end{pmatrix} \end{matrix} \quad (36a)$$

$$\mathcal{M}_{i,j}^p = \begin{matrix} & \mathcal{H}_1 & \mathcal{H}_2 \\ \begin{matrix} \mathcal{P}_1 \\ \mathcal{P}_2 \end{matrix} & \begin{pmatrix} \sigma & \sigma(1-\tau) \\ (1-\kappa)\sigma & \sigma(1+\alpha-\kappa) \end{pmatrix} \end{matrix}, \quad (36b)$$

690 where the notations  $a$ ,  $c$ ,  $k$ ,  $t$ , and  $s$  in (Parker, 1994) are changed to  $\alpha$ ,  $\gamma$ ,  $\kappa$ ,  
 691  $\tau$ , and  $\sigma$ , respectively. According to Parker (1994), the fitness of the “narrowly  
 692 virulent pathogen”  $\mathcal{P}_1$  is reduced by a factor  $\tau$  by interacting with the resistant  
 693 host  $\mathcal{H}_2$ ; a fitness penalty  $\kappa$  (the cost of virulence) is inflicted on the “broadly  
 694 virulent pathogen”  $\mathcal{P}_2$  independent of which host it exploits;  $\alpha$  the “advantage of

695 adapted pathogens on resistant host” measures a special advantage of  $\mathcal{P}_2$  on  $\mathcal{H}_2$ ;  
 696 a fitness penalty  $\gamma$  (the cost of resistance) is paid by the resistant host  $\mathcal{H}_2$ . When  
 697  $\tau = \kappa = \alpha = 1$  and  $\gamma = 0$  the fitnesses conform to the pattern of pure MA  
 698 model. When  $\tau = 1$  and  $\alpha = 0$  the fitnesses revert to a pure GfG pattern. The  
 699 ratio between the two oscillation frequencies at the interior fixed point is

$$m = \frac{\sqrt{\kappa}\sqrt{\alpha\sigma + \gamma}\sqrt{\alpha - \kappa + \tau}\sqrt{\sigma\tau - \gamma}}{\sqrt{\sigma}\sqrt{\alpha - \kappa\tau + \tau}\sqrt{\sigma(\alpha - \kappa\tau + \tau) + \gamma\kappa}}. \quad (37)$$

700 The ratio is 1 for pure MA model. With a set of parameter used in (Parker, 1994),  
 701  $\alpha = 0.33$ ,  $\gamma = 0$ ,  $\kappa = 0.05$ , and  $\sigma = \tau = 1$  the ratio is about 0.1.

702 The same method can be applied for the system with constant population size.  
 703 There the interior fixed point expressed by the general interaction matrices ele-  
 704 ments is

$$h_1^* = \frac{\mathcal{M}_{22}^p - \mathcal{M}_{12}^p}{\mathcal{M}_{11}^p + \mathcal{M}_{22}^p - \mathcal{M}_{12}^p - \mathcal{M}_{21}^p} \quad (38a)$$

$$p_1^* = \frac{\mathcal{M}_{22}^h - \mathcal{M}_{12}^h}{\mathcal{M}_{11}^h + \mathcal{M}_{22}^h - \mathcal{M}_{12}^h - \mathcal{M}_{21}^h}, \quad (38b)$$

705 while  $h_2^* = 1 - h_1^*$  and  $p_2^* = 1 - p_1^*$ . The eigenvalues of the Jacobian matrix at the  
 706 interior fixed point are

$$\Lambda_{1,2} = 0 \quad \text{and} \quad (39)$$

$$\Lambda_{3,4} = \pm i \sqrt{-\frac{(\mathcal{M}_{11}^h - \mathcal{M}_{21}^h)(\mathcal{M}_{22}^h - \mathcal{M}_{12}^h)(\mathcal{M}_{11}^p - \mathcal{M}_{21}^p)(\mathcal{M}_{22}^p - \mathcal{M}_{12}^p)}{(\mathcal{M}_{11}^h + \mathcal{M}_{22}^h - \mathcal{M}_{12}^h - \mathcal{M}_{21}^h)(\mathcal{M}_{11}^p + \mathcal{M}_{22}^p - \mathcal{M}_{12}^p - \mathcal{M}_{21}^p)}}$$

Hence, there only is one oscillation frequency at the interior fixed point in models with constant population size, regardless of the specific assumption for the interaction matrices.

## D Linear interpolation between MA and GfG models

Alternatively to the models of [Agrawal and Lively \(2002\)](#) and [Parker \(1994\)](#), one could also use a linear interpolation between MA and gene-for-gene model, where the matrix elements linearly spans over the values of the two models as a single parameter  $\alpha$  varies between 0 and 1

$$\mathcal{M}^h = \begin{matrix} & \mathcal{P}_1 & \mathcal{P}_2 \\ \mathcal{H}_1 & \begin{pmatrix} -\sigma & -\alpha(1 - \kappa)\sigma \\ -\alpha\gamma & -\alpha\gamma - (1 - \alpha\kappa)\sigma \end{pmatrix} \end{matrix} \quad (40a)$$

$$\mathcal{M}^p = \begin{matrix} & \mathcal{H}_1 & \mathcal{H}_2 \\ \begin{matrix} \mathcal{P}_1 \\ \mathcal{P}_2 \end{matrix} & \begin{pmatrix} \sigma & 0 \\ \alpha(1-\kappa)\sigma & (1-\alpha\kappa)\sigma \end{pmatrix} \end{matrix}. \quad (40b)$$

716 The fixed point with Lotka-Volterra dynamics is then

$$h_1^* = \frac{1}{\sigma} d_p \quad (41a)$$

$$h_2^* = \frac{1 - \alpha(1 - \kappa)}{\sigma(1 - \alpha\kappa)} d_p$$

$$p_1^* = \frac{\alpha(\gamma - \sigma) + \sigma}{\sigma(\alpha\gamma(1 - \alpha(1 - \kappa)) + \sigma(1 - \alpha\kappa))} b_h \quad (41b)$$

$$p_2^* = \frac{\sigma - \alpha\gamma}{\sigma(\alpha\gamma(1 - \alpha(1 - \kappa)) - \sigma(1 - \alpha\kappa))} b_h,$$

717 and the eigenvalues of the Jacobian matrix at this point are

$$\Lambda_{1,2} = \pm i \sqrt{b_h d_p} \quad \text{and} \quad (42)$$

$$\Lambda_{3,4} = \pm i \sqrt{b_h d_p} \frac{\sqrt{1 - \alpha(1 - \kappa)} \sqrt{(\sigma - \alpha\gamma)(\alpha\gamma + (1 - \alpha)\sigma)}}{\sqrt{\sigma} \sqrt{\alpha\gamma(1 - \alpha(1 - \kappa)) + \sigma(1 - \alpha\kappa)}}.$$

718 As long as  $\alpha\gamma < \sigma$  the ratio  $m = \Lambda_{3,4}/\Lambda_{1,2}$  increases with increasing cost of

719 virulence  $\kappa$  while  $m$  decreases with increasing  $\alpha$ . For  $\alpha \approx 0$ , we find

$$m \approx 1 - \frac{\alpha(\gamma + 2(1 - \kappa)\sigma)}{2\sigma}. \quad (43)$$

720 Hence, there are always two distinct oscillation frequencies at the interior fixed  
721 point in gene-for-gene-like models with changing population size.

722 With Replicator Dynamics the interior fixed point is

$$h_1^* = \frac{1 - \alpha\kappa}{2 - \alpha} \quad (44a)$$

$$p_1^* = \frac{\alpha\gamma + \sigma(1 - \alpha)}{\sigma(2 - \alpha)}, \quad (44b)$$

723 while  $h_2^* = 1 - h_1^*$  and  $p_2^* = 1 - p_1^*$ . The eigenvalues of the Jacobian matrix at the  
724 interior fixed point are

$$\Lambda_{1,2} = 0 \quad \text{and} \quad (45)$$

$$\Lambda_{3,4} = \pm i \frac{\sqrt{1 - \alpha + \alpha^2\kappa(1 - \kappa)} \sqrt{(\sigma - \alpha\gamma)(\alpha\gamma + (1 - \alpha)\sigma)}}{2 - \alpha}$$

725 Hence, there is only one oscillation frequency  $l = \Lambda_3/(i2\pi)$  at the interior fixed  
726 point in models with constant population size. As long as  $\alpha\gamma < \sigma$ , the oscillation  
727 frequency  $l$  decreases with  $\alpha$  and increases with  $\gamma$  and  $\sigma$ , while  $l$  increases with  $\kappa$



728 until  $\kappa$  reaches the value  $1/2$ , then  $l$  decreases as  $\kappa$  increases from  $1/2$  to  $1$ . For

729  $\alpha \approx 0$ ,

$$l \approx \frac{1}{2\pi} \left( \frac{\sigma}{2} - \frac{\alpha\sigma}{4} \right) . \quad (46)$$
